# Supplementary material for: Juvenile hormone affects age polyethism, ovarian status and cuticular hydrocarbon profile in workers of the waspPolybia occidentalis
Source: Oxford University Press journal article supplement (doi:10.1242/jeb.240200), 2021-06-10
Supplement: jeb240200supp.pdf [file jeb240200supp.pdf]

**Table S1.** Comparison of age variation in the tasks between the treatments. \* Significant p-values.

| Cell inspector | Tukey test | p       | Builder   | Tukey test | p       | Forager   | Tukey test | p        |
|----------------|------------|---------|-----------|------------|---------|-----------|------------|----------|
| NTW x STW      | 1.468      | 0.1999  | NTW x STW | 0.605      | 0.5448  | NTW x STW | 3.553      | <0.01*   |
| NTW x MTW      | 3.803      | <0.01*  | NTW x MTW | 2.073      | 0.0764  | NTW x MTW | 3.047      | <0.01*   |
| NTW x PTW      | -0.008     | 0.9935  | NTW x PTW | -3.273     | <0.01*  | NTW x PTW | -2.574     | 0.02008* |
| STW x MTW      | -2.474     | 0.0267* | STW x MTW | -1.295     | 0.2601  | STW x MTW | 0.395      | 0.6926   |
| STW x PTW      | 1.383      | 0.1999  | STW x PTW | -2.423     | 0.0461* | STW x PTW | 1.069      | 0.4278   |
| MTW x PTW      | 3.669      | <0.01*  | MTW x PTW | -1.235     | 0.2601  | MTW x PTW | 0.622      | 0.6410   |

**Table S2.** Chemical compounds profile from *P. occidentalis* workers of all treatments with peak number, retention time (min) and compounds name.

| Peaks | Retention time (min) | Compounds                                 | Peaks | Retention time (min) | Compounds                               |
|-------|----------------------|-------------------------------------------|-------|----------------------|-----------------------------------------|
| 1     | 10.530               | z-C <sub>21</sub>                         | 37    | 23.660               | 15-;14-;13-;12-;11-;10MeC <sub>30</sub> |
| 2     | 10.711               | n-C <sub>21</sub>                         | 38    | 24.255               | 4MeC <sub>30</sub>                      |
| 3     | 11.940               | n-C <sub>22</sub>                         | 39    | 24.517               | 3MeC <sub>30</sub>                      |
| 4     | 13.002               | z-C <sub>23</sub>                         | 40    | 24.606               | z-C <sub>31</sub>                       |
| 5     | 13.025               | n-C <sub>23</sub>                         | 41    | 24.754               | 4,16-;4,14-;4,12 diMeC <sub>30</sub>    |
| 6     | 14.277               | n-C <sub>24</sub>                         | 42    | 24.809               | n-C <sub>31</sub>                       |
| 7     | 15.391               | n-C <sub>25</sub>                         | 43    | 24.822               | 3,15-; 3,13-;3,11diMetilC <sub>30</sub> |
| 8     | 15.769               | 13-;11-;9MeC <sub>25</sub>                | 44    | 25.390               | 15-;13-;11-;9-;7MeC <sub>31</sub>       |
| 9     | 16.210               | 5MeC <sub>25</sub>                        | 45    | 25.645               | 7MeC <sub>31</sub>                      |
| 10    | 16.211               | 3MeC <sub>25</sub>                        | 46    | 25.770               | 5MeC <sub>31</sub>                      |
| 11    | 16.529               | n-C <sub>26</sub>                         | 47    | 25.871               | 11,15-;11,13diMeC <sub>31</sub>         |
| 12    | 17.273               | 4MeC <sub>26</sub>                        | 48    | 25.946               | 9,15-;9,13diMeC <sub>31</sub>           |
| 13    | 17.435               | z-C <sub>27</sub>                         | 49    | 26.050               | 7,15-;7,13diMeC <sub>31</sub>           |
| 14    | 17.781               | n-C <sub>27</sub>                         | 50    | 26.141               | 3MeC <sub>31</sub>                      |
| 15    | 18.230               | 13-;11-;9MeC <sub>27</sub>                | 51    | 26.222               | 5,15-;5,13-;5,11 diMeC <sub>31</sub>    |
| 16    | 18.480               | 7MeC <sub>27</sub>                        | 52    | 26.613               | 3,15-;3,13-;3,11 diMeC <sub>31</sub>    |
| 17    | 18.503               | 5MeC <sub>27</sub>                        | 53    | 26.969               | 14,18-;14,16diMeC <sub>32</sub>         |
| 18    | 18.900               | 3MeC <sub>27</sub>                        | 54    | 27.812               | 13,15diMeC <sub>32</sub>                |
| 19    | 19.022               | 5,11diMeC <sub>27</sub>                   | 55    | 27.230               | z-C <sub>33</sub>                       |
| 20    | 19.320               | n-C <sub>28</sub>                         | 56    | 27.712               | 4,16-;4,14-;4,12diMeC <sub>32</sub>     |
| 21    | 19.546               | 3,13; 3,11 diMeC <sub>27</sub>            | 57    | 27.859               | n-C <sub>33</sub>                       |
| 22    | 19.615               | 3,7diMeC <sub>27</sub>                    | 58    | 28.410               | 15-;13-;11MeC <sub>33</sub>             |
| 23    | 19.879               | 14-;13-;12-;11-;10-;9-;8MeC <sub>28</sub> | 59    | 28.644               | 11,15diMeC <sub>33</sub>                |
| 24    | 20.542               | 4MeC <sub>28</sub>                        | 60    | 28.838               | 7,13diMeC <sub>33</sub>                 |
| 25    | 20.860               | 3MeC <sub>28</sub>                        | 61    | 28.984               | 5,15-;5,13diMeC <sub>33</sub>           |
| 26    | 20.938               | z-C <sub>29</sub>                         | 62    | 29.421               | 3,15-;3,13diMeC <sub>33</sub>           |
| 27    | 21.304               | n-C <sub>29</sub>                         | 63    | 31.036               | 15-;13-;11MeC <sub>35</sub>             |
| 28    | 21.995               | 15-;13-;11-;9MeC <sub>29</sub>            | 64    | 31.709               | 5,15-;5,13diMeC <sub>35</sub>           |
| 29    | 22.086               | 7MeC <sub>29</sub>                        | 65    | 31.928               | 3,13diMeC <sub>35</sub>                 |

|    |        |                                     |    |        |                                 |
|----|--------|-------------------------------------|----|--------|---------------------------------|
| 30 | 22.238 | 5MeC <sub>29</sub>                  | 66 | 33.854 | 15-;13-,11MeC <sub>37</sub>     |
| 31 | 22.567 | 9,13diMeC <sub>29</sub>             | 67 | 34.323 | 11,XdiMeC <sub>37</sub>         |
| 32 | 22.620 | 7,13-;7,11 diMeC <sub>29</sub>      | 68 | 37.773 | 15-;13-;11MeC <sub>39</sub>     |
| 33 | 22.772 | 5,15-;5,13-;5,11diMeC <sub>29</sub> | 60 | 38.361 | 11,15-;11,13diMeC <sub>39</sub> |
| 34 | 22.823 | 3MeC <sub>29</sub>                  | 70 | 38.659 | 7,15-;7,13diMeC <sub>39</sub>   |
| 35 | 23.260 | n-C <sub>30</sub>                   | 71 | 39.595 | 3,15-;3,13diMeC <sub>39</sub>   |
| 36 | 23.351 | 3,13-;3,11diMeC <sub>29</sub>       | 72 | 39.905 | 14MeC <sub>40</sub>             |

**Table S3.** Compounds from SIMPER analysis that are important in the separation of the tasks within each treatment with significant p-values.

| No treatment                              | p     | Acetone                                 | p      |
|-------------------------------------------|-------|-----------------------------------------|--------|
| Cell inspector x Builder                  |       | Cell inspector x Builder                |        |
| 15-;13-;11-;9-;7MeC <sub>31</sub>         | 0.043 | 13-;11-;9MeC <sub>27</sub>              | 0.0026 |
| n.C <sub>31</sub>                         | 0.001 | 15-;14-;13-;12-;11-;10MeC <sub>30</sub> | 0.0009 |
| 5MeC <sub>27</sub>                        | 0.001 | 15-;13-;11MeC <sub>39</sub>             | 0.0001 |
| -                                         |       | 5MeC <sub>27</sub>                      | 0.0001 |
| -                                         |       | 5MeC <sub>29</sub>                      | 0.001  |
| Cell inspector x Forager                  |       | Cell inspector x Forager                |        |
| 3MeC <sub>29</sub>                        | 0.001 | 15-;13-;11-;9-;7MeC <sub>31</sub>       | 0.0357 |
| z.C <sub>29</sub>                         | 0.002 | 3,13-;3,11diMeC <sub>29</sub>           | 0.0258 |
| 7,13-;7,11diMeC <sub>29</sub>             | 0.001 | 13-;11-;9MeC <sub>27</sub>              | 0.0366 |
| -                                         |       | 15-;13-;11MeC <sub>39</sub>             | 0.0001 |
| -                                         |       | 5MeC <sub>27</sub>                      | 0.0001 |
| Builder x Forager                         |       | Builder x Forager                       |        |
| 3MeC <sub>29</sub>                        | 0.001 | n.C <sub>29</sub>                       | 0.01   |
| n.C <sub>27</sub>                         | 0.014 | 5MeC <sub>29</sub>                      | 0.0033 |
| 3MeC <sub>27</sub>                        | 0.004 | 5,15-;5,13-;5,11diMeC <sub>31</sub>     | 0.0497 |
| 5MeC <sub>27</sub>                        | 0.001 | -                                       |        |
| n.C <sub>31</sub>                         | 0.001 | -                                       |        |
| z.C <sub>29</sub>                         | 0.045 | -                                       |        |
| 7,13-;7,11diMeC <sub>29</sub>             | 0.001 | -                                       |        |
| 15-;14-;13-;12-;11-;10MeC <sub>30</sub>   | 0.016 | -                                       |        |
| 14-;13-;12-;11-;10-;9-;8MeC <sub>28</sub> | 0.012 | -                                       |        |
| Methoprene                                | p     | Precocene                               | p      |
| Cell inspector x Builder                  |       | Cell inspector x Builder                |        |

|                                         |        |                                           |        |
|-----------------------------------------|--------|-------------------------------------------|--------|
| n.C <sub>29</sub>                       | 0.0013 | 11,XdiMeC <sub>37</sub>                   | 0.0001 |
| 15-;13-;11-;9-;7MeC <sub>31</sub>       | 0.0001 | 5,15-;5,13-;5,11diMeC <sub>29</sub>       | 0.0001 |
| 3MeC <sub>29</sub>                      | 0.0001 | 15-;13-;11MeC <sub>39</sub>               | 0.0001 |
| n.C <sub>23</sub>                       | 0.0001 | -                                         |        |
| n.C <sub>31</sub>                       | 0.0001 | -                                         |        |
| 13-;11-;9MeC <sub>27</sub>              | 0.0001 | -                                         |        |
| 3,13-;3,11diMeC <sub>29</sub>           | 0.0048 | -                                         |        |
| 3,15-;3,13-;3,11diMeC <sub>31</sub>     | 0.0001 | -                                         |        |
| 15-;14-;13-;12-;11-;10MeC <sub>30</sub> | 0.0001 | -                                         |        |
| 7MeC <sub>29</sub>                      | 0.0001 | -                                         |        |
| 5,15-;5,13-;5,11diMeC <sub>29</sub>     | 0.0001 | -                                         |        |
| 15-;13-;11MeC <sub>39</sub>             | 0.0001 | -                                         |        |
| 5MeC <sub>27</sub>                      | 0.0001 | -                                         |        |
| 5MeC <sub>29</sub>                      | 0.0001 | -                                         |        |
| 5,15-;5,13-;5,11diMeC <sub>31</sub>     | 0.0021 | -                                         |        |
| Cell inspector x Forager                |        | Cell inspector x Forager                  |        |
| n.C <sub>29</sub>                       | 0.0054 | 5,15-;5,13-;5,11diMeC <sub>29</sub>       | 0.0001 |
| 3MeC <sub>29</sub>                      | 0.0007 | 11,XdiMeC <sub>37</sub>                   | 0.0001 |
| 3MeC <sub>27</sub>                      | 0.0001 | 5MeC <sub>29</sub>                        | 0.0424 |
| n.C <sub>23</sub>                       | 0.0001 | -                                         |        |
| n.C <sub>27</sub>                       | 0.0153 | -                                         |        |
| n.C <sub>31</sub>                       | 0.0001 | -                                         |        |
| 3,13-;3,11diMeC <sub>29</sub>           | 0.0002 | -                                         |        |
| 13-;11-;9MeC <sub>27</sub>              | 0.0002 | -                                         |        |
| 3,15-;3,13-;3,11diMeC <sub>31</sub>     | 0.0002 | -                                         |        |
| 5,15-;5,13-;5,11diMeC <sub>29</sub>     | 0.0001 | -                                         |        |
| 15-;13-;11MeC <sub>33</sub>             | 0.0001 | -                                         |        |
| 5MeC <sub>27</sub>                      | 0.0001 | -                                         |        |
| 7MeC <sub>29</sub>                      | 0.0001 | -                                         |        |
| 15-;13-;11MeC <sub>39</sub>             | 0.0001 | -                                         |        |
| 5MeC <sub>29</sub>                      | 0.0145 | -                                         |        |
| n.C <sub>28</sub>                       | 0.0009 | -                                         |        |
| Builder x Forager                       |        | Builder x Forager                         |        |
| n.C <sub>27</sub>                       | 0.0222 | 15-;13-;11MeC <sub>39</sub>               | 0.0001 |
| -                                       |        | 14-;13-;12-;11-;10-;9-;8MeC <sub>28</sub> | 0.0354 |

**Table S4.** Results from comparing the chemical profile of workers within each task between the treatments. \* Significant p-values.

| <b>Cell inspector</b> | NTW       | STW       | MTW       |
|-----------------------|-----------|-----------|-----------|
| NTW                   |           | p < 0.01* | p < 0.01* |
| MTW                   | p < 0.01* | p < 0.01* |           |
| PTW                   | p < 0.01* | p < 0.01* | p < 0.01* |
| <b>Builder</b>        | NTW       | STW       | MTW       |
| NTW                   |           | p < 0.01* | p < 0.01* |
| MTW                   | p < 0.01* | p = 0.22  |           |
| PTW                   | p = 0.01* | p = 0.20  | p = 0.35  |
| <b>Forager</b>        | NTW       | STW       | MTW       |
| NTW                   |           | p = 0.01* | p = 0.02* |
| MTW                   | p = 0.01* | p = 0.02* |           |
| PTW                   | p = 0.02* | p = 0.15  | p = 0.01* |

**Table S5.** Compounds from SIMPER analysis that are important in the separation of the treatments within each task with significant p-values.

| <b>Cell inspector</b>                   | <b>p</b> | <b>Builder</b>                 | <b>p</b> | <b>Forager</b>                      | <b>p</b> |
|-----------------------------------------|----------|--------------------------------|----------|-------------------------------------|----------|
| NTW x MTW                               |          | NTW x MTW                      |          | NTW x MTW                           |          |
| n.C <sub>29</sub>                       | 0.002    | 15-;13-;11-;9MeC <sub>29</sub> | 0.001    | 3,15-;3,13-;3,11diMeC <sub>31</sub> | 0.004    |
| 3MeC <sub>29</sub>                      | 0.001    | n.C <sub>31</sub>              | 0.001    | 7,13-;7,11diMeC <sub>29</sub>       | 0.001    |
| n.C <sub>31</sub>                       | 0.001    | 5MeC <sub>27</sub>             | 0.001    | z-C <sub>29</sub>                   | 0.039    |
| n.C <sub>23</sub>                       | 0.001    | -                              | -        | -                                   | -        |
| 13-;11-;9MeC <sub>27</sub>              | 0.004    | -                              | -        | -                                   | -        |
| 3MeC <sub>27</sub>                      | 0.024    | -                              | -        | -                                   | -        |
| 15-;14-;13-;12-;11-;10MeC <sub>30</sub> | 0.002    | -                              | -        | -                                   | -        |
| 15-;13-;11MeC <sub>33</sub>             | 0.001    | -                              | -        | -                                   | -        |
| 7MeC <sub>29</sub>                      | 0.001    | -                              | -        | -                                   | -        |
| 5,15-;5,13-;5,11diMeC <sub>29</sub>     | 0.001    | -                              | -        | -                                   | -        |
| 15-;13-;11MeC <sub>39</sub>             | 0.001    | -                              | -        | -                                   | -        |
| 5MeC <sub>27</sub>                      | 0.001    | -                              | -        | -                                   | -        |
| 5MeC <sub>29</sub>                      | 0.001    | -                              | -        | -                                   | -        |
| NTW x PTW                               |          | NTW x PTW                      |          | NTW x PTW                           |          |
| 15-;13-;11-;9MeC <sub>29</sub>          | 0.004    | n.C <sub>31</sub>              | 0.001    | 15-;13-;11MeC <sub>39</sub>         | 0.001    |
| 11,XdiMeC <sub>37</sub>                 | 0.001    | 5MeC <sub>27</sub>             | 0.001    | 7,13-;7,11diMeC <sub>29</sub>       | 0.001    |
| 15-;13-;11MeC <sub>39</sub>             | 0.001    | n.C <sub>28</sub>              | 0.018    | -                                   | -        |
| 5,15-;5,13-;5,11diMeC <sub>29</sub>     | 0.001    | -                              | -        | -                                   | -        |
| NTW x STW                               |          | NTW x STW                      |          | NTW x STW                           |          |
| 15-;13-;11MeC <sub>39</sub>             | 0.001    | n.C <sub>31</sub>              | 0.036    | 15-;13-;11-;9MeC <sub>29</sub>      | 0.042    |
| 5MeC <sub>27</sub>                      | 0.001    | 5MeC <sub>27</sub>             | 0.001    | z.C <sub>29</sub>                   | 0.003    |

|                                          |       |                                           |       |                                         |       |
|------------------------------------------|-------|-------------------------------------------|-------|-----------------------------------------|-------|
| -                                        |       | 15-;14-;13-;12-;11-;10MeC <sub>30</sub>   | 0.002 | 7,13-;7,11diMeC <sub>29</sub>           | 0.001 |
| -                                        |       | 5MeC <sub>29</sub>                        | 0.001 | n-C <sub>31</sub>                       | 0.039 |
| <hr/>                                    |       |                                           |       |                                         |       |
| MTW x PTW                                |       | MTW x PTW                                 |       | MTW x PTW                               |       |
| <hr/>                                    |       |                                           |       |                                         |       |
| 15-;13-;11-;9-;7MeC <sub>31</sub>        | 0.003 | n.C <sub>29</sub>                         | 0.026 | 3,13-;3,11diMeC <sub>29</sub>           | 0.041 |
| 3MeC <sub>29</sub>                       | 0.014 | 3,13-;3,11diMeC <sub>29</sub>             | 0.044 | 3MeC <sub>27</sub>                      | 0.026 |
| n.C <sub>23</sub>                        | 0.001 | -                                         |       | 3,15-;3,13-;3,11diMeC <sub>31</sub>     | 0.009 |
| n.C <sub>31</sub>                        | 0.001 | -                                         |       | 15-;13-;11MeC <sub>39</sub>             | 0.001 |
| 13-;11-;9MeC <sub>27</sub>               | 0.008 | -                                         |       | 15-;14-;13-;12-;11-;10MeC <sub>30</sub> | 0.040 |
| 3,15-;3,13-;3,11diMeC <sub>31</sub>      | 0.006 | -                                         |       | -                                       |       |
| 3MeC <sub>27</sub>                       | 0.001 | -                                         |       | -                                       |       |
| 15-;14-;13-;12-;11-;10MeC <sub>30</sub>  | 0.003 | -                                         |       | -                                       |       |
| 11,XdiMeC <sub>37</sub>                  | 0.001 | -                                         |       | -                                       |       |
| 7MeC <sub>29</sub>                       | 0.001 | -                                         |       | -                                       |       |
| 15-;13-;11MeC <sub>33</sub>              | 0.038 | -                                         |       | -                                       |       |
| 5MeC <sub>27</sub>                       | 0.001 | -                                         |       | -                                       |       |
| 5MeC <sub>29</sub>                       | 0.001 | -                                         |       | -                                       |       |
| <hr/>                                    |       |                                           |       |                                         |       |
| MTW x STW                                |       | MTW x STW                                 |       | MTW x STW                               |       |
| <hr/>                                    |       |                                           |       |                                         |       |
| 3MeC <sub>29</sub>                       | 0.004 | 3MeC <sub>29</sub>                        | 0.009 | 3,13-;3,11diMeC <sub>29</sub>           | 0.007 |
| n.C <sub>23</sub>                        | 0.001 | 15-;14-;13-;12-;11-;10MeC <sub>30</sub>   | 0.003 | 3MeC <sub>27</sub>                      | 0.010 |
| n.C <sub>31</sub>                        | 0.001 | 5MeC <sub>29</sub>                        | 0.011 | n.C <sub>28</sub>                       | 0.049 |
| 3,13-;3,11diMeC <sub>29</sub>            | 0.005 | -                                         |       | 5,15-;5,13-;5,11diMeC <sub>31</sub>     | 0.033 |
| 0.0333,15-;3,13-;3,11diMeC <sub>31</sub> | 0.001 | -                                         |       | -                                       |       |
| 13-;11-;9MeC <sub>27</sub>               | 0.006 | -                                         |       | -                                       |       |
| 3MeC <sub>27</sub>                       | 0.001 | -                                         |       | -                                       |       |
| 7MeC <sub>29</sub>                       | 0.001 | -                                         |       | -                                       |       |
| 5,15-;5,13-;5,11diMeC <sub>29</sub>      | 0.001 | -                                         |       | -                                       |       |
| 15-;13-;11MeC <sub>33</sub>              | 0.003 | -                                         |       | -                                       |       |
| 5MeC <sub>29</sub>                       | 0.007 | -                                         |       | -                                       |       |
| n.C <sub>28</sub>                        | 0.005 | -                                         |       | -                                       |       |
| 5,15-;5,13-;5,11diMeC <sub>31</sub>      | 0.001 | -                                         |       | -                                       |       |
| <hr/>                                    |       |                                           |       |                                         |       |
| PTW x STW                                |       | PTW x STW                                 |       | PTW x STW                               |       |
| <hr/>                                    |       |                                           |       |                                         |       |
| 11,XdiMeC <sub>37</sub>                  | 0.001 | 13-;11-;9MeC <sub>27</sub>                | 0.023 | 15-;13-;11MeC <sub>39</sub>             | 0.001 |
| 5,15-;5,13-;5,11diMeC <sub>29</sub>      | 0.001 | 15-;14-;13-;12-;11-;10MeC <sub>30</sub>   | 0.006 | -                                       |       |
| 5MeC <sub>27</sub>                       | 0.001 | 14-;13-;12-;11-;10-;9-;8MeC <sub>28</sub> | 0.004 | -                                       |       |
|                                          |       | 15-;13-;11MeC <sub>33</sub>               | 0.043 | -                                       |       |
| <hr/>                                    |       |                                           |       |                                         |       |

**Table S6.** Comparison of ovaries types between the treatments in each task. \* Significant p-values.

| <b>Cell inspector</b> |        |         |
|-----------------------|--------|---------|
|                       | z      | p       |
| NTW x STW             | -0.795 | 0.4282  |
| NTW x MTW             | -2.694 | 0.0424  |
| NTW x PTW             | 1.986  | 0.0941  |
| STW x MTW             | 2.288  | 0.0664  |
| STW x PTW             | 1.464  | 0.2149  |
| MTW x PTW             | -0.792 | 0.4282  |
| <b>Builder</b>        |        |         |
|                       | z      | p       |
| NTW x STW             | 0.228  | 0.8196  |
| NTW x MTW             | -3.189 | <0.01*  |
| NTW x PTW             | 1.546  | 0.1752  |
| STW x MTW             | 2.685  | 0.0217* |
| STW x PTW             | 1.454  | 0.1752  |
| MTW x PTW             | -1.992 | 0.0927  |
| <b>Forager</b>        |        |         |
|                       | z      | p       |
| NTW x STW             | -0.378 | 0.8465  |
| NTW x MTW             | -2.889 | <0.01*  |
| NTW x PTW             | -0.164 | 0.8701  |
| STW x MTW             | 2.831  | <0.01   |
| STW x PTW             | -0.558 | 0.8465  |
| MTW x PTW             | -3.122 | <0.01*  |
